# Supplementary material
Source: publisher figshare collection journal article supplement (https://future-science-group.figshare.com/ndownloader/files/34796881)

**Methylated circulating cell-free DNA from plasma biomarkers of Alzheimer’s disease using targeted bisulfite sequencing**

**Supplementary figure 1:** Quality-control steps of our custom targeted bisulfite sequencing workflow: fragment sizes profiles of ccfDNA, pre-capture library preparation, library preparation analysed by Bioanalyzer Instrument and insert sizes profiles of targeted sequencing data.


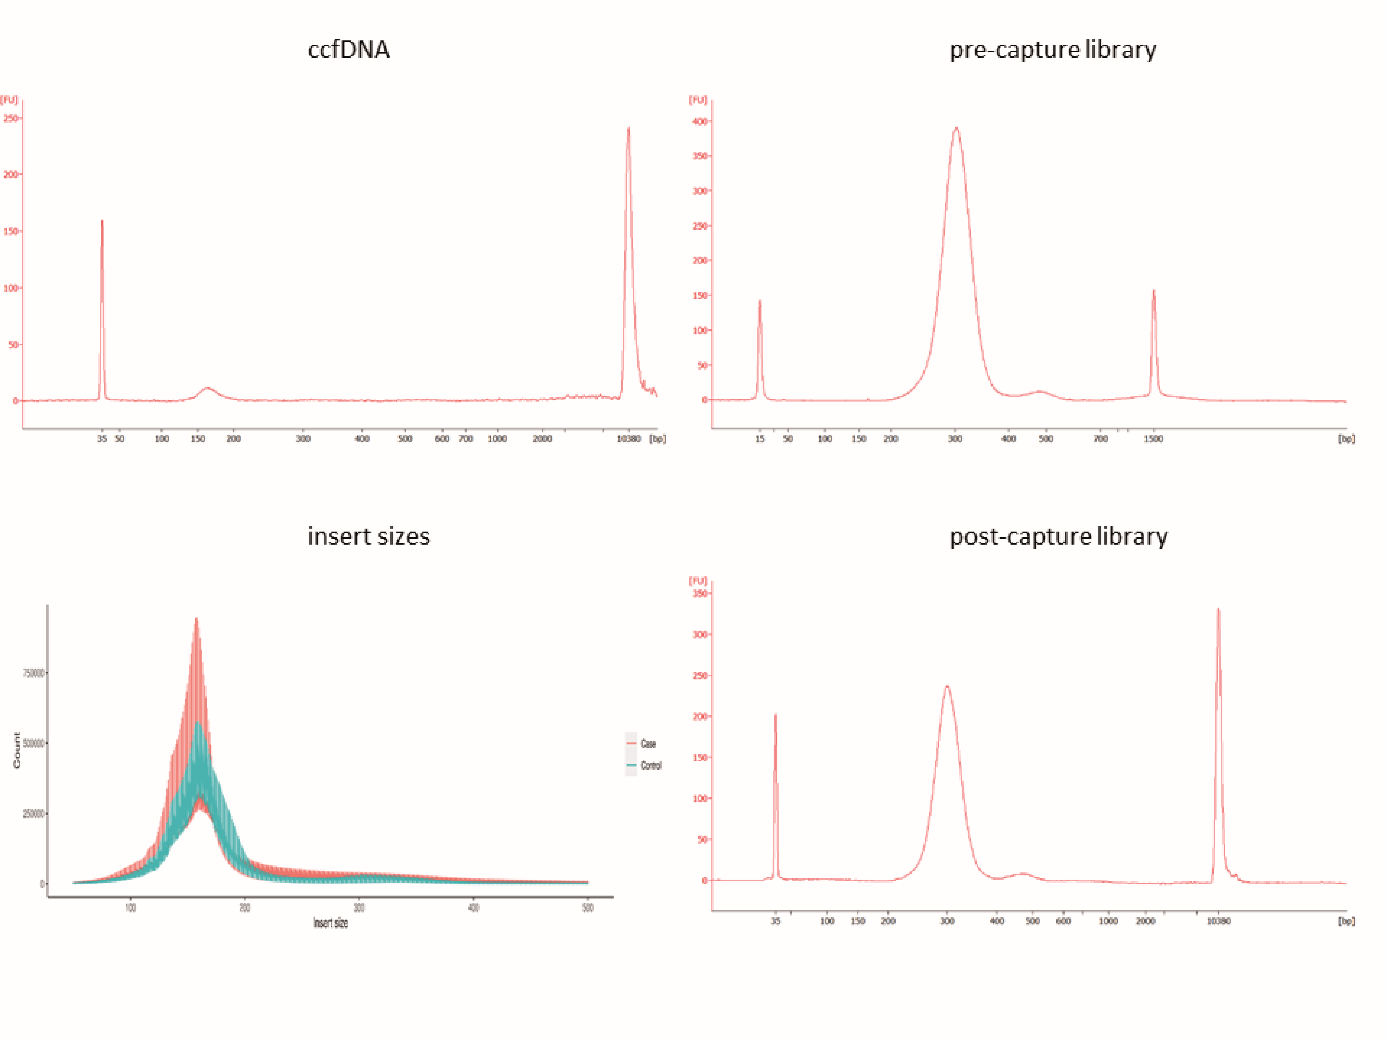

Supplement: Supplementary file 1 [file 34796881]
